# Supplementary material for: New trifluoromethylated derivatives of [60]fullerene, C60(CF3)n with n = 12 and 14
Source: Royal Society of Chemistry journal article supplement (doi:10.1039/b709684d), 2007-01-01
Supplement: b709684d.pdf [file b709684d.pdf]

*Supporting information for*

**New trifluoromethylated derivatives of [60]fullerene,  $C_{60}(CF_3)_n$  with  
 $n = 12$  and  $14$**

*N. A. Omelyanyuk, A. A. Goryunkov, N. B. Tamm, S. M. Avdoshenko, I. N. Ioffe, L. N. Sidorov,  
E. Kemnitz and S. I. Troyanov*

*Chem. Commun.*

**Table of contents**

- UV/Vis spectra of isolated  $S_6$ - $C_{60}(CF_3)_{12}$ -I,  $C_{60}(CF_3)_{12}$ -III and  $C_{60}(CF_3)_{14}$ -I, II *S2*
- The Schlegel diagrams, relative energies (at the DFT and AM1 levels of theory), and IUPAC lowest-locant abbreviation for the isomers of  $C_{60}(CF_3)_{12}$  *S3*
- The Schlegel diagrams, relative energies (at the DFT and AM1 levels of theory), and IUPAC lowest-locant abbreviation for the isomers of  $C_{60}(CF_3)_{14}$  *S7*

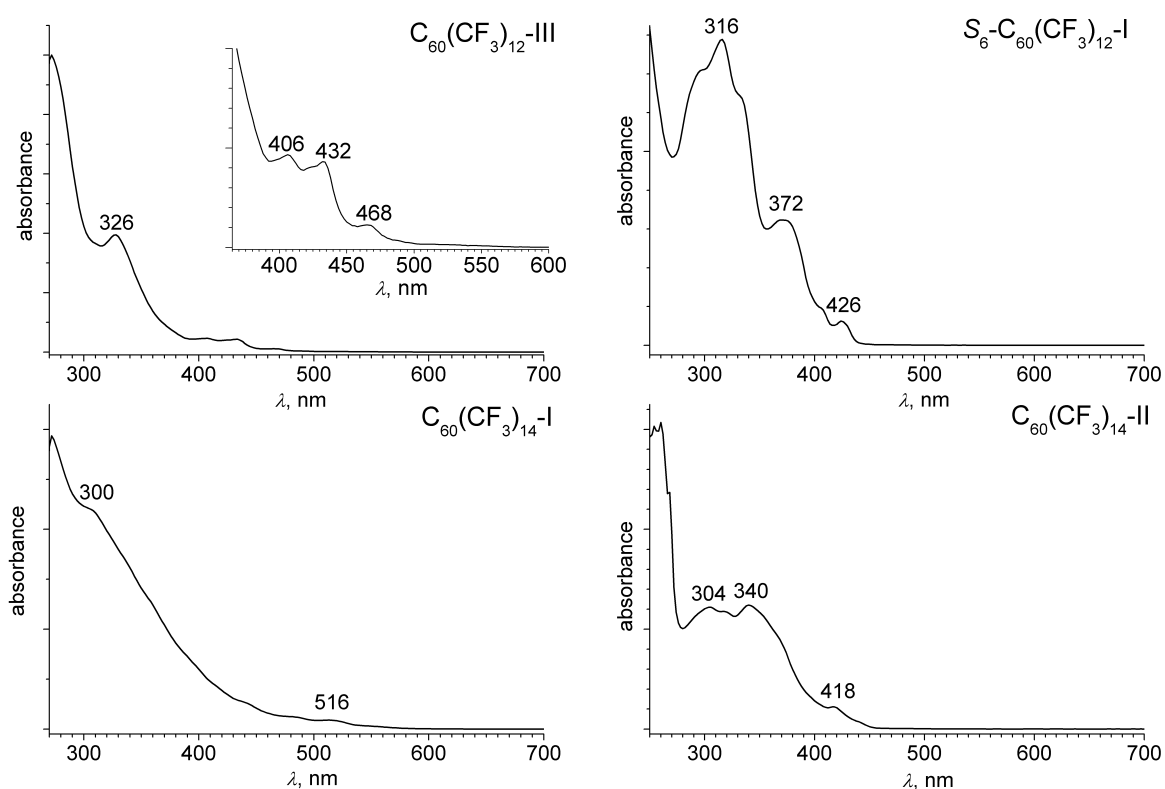

Figure 1. UV/Vis spectra of isolated S<sub>6</sub>-C<sub>60</sub>(CF<sub>3</sub>)<sub>12</sub>-I, C<sub>60</sub>(CF<sub>3</sub>)<sub>12</sub>-III and C<sub>60</sub>(CF<sub>3</sub>)<sub>14</sub>-I, II (hexane solution, 270-700 nm range, 2 nm resolution)

**Table 1.** The Schlegel diagrams, relative energies (at the DFT and AM1 levels of theory), and IUPAC lowest-locant abbreviation for the most stable isomers of  $C_{60}(CF_3)_{12}$  within the gap of  $50 \text{ kJ}\cdot\text{mol}^{-1}$ . The fields with experimentally observed isomers are shadowed. The energies from the ref. [S1] are given in the parentheses.

| $N_0N_0$ | Schlegel Diagrams of $C_{60}(CF_3)_{12}$                                            | $\Delta\Delta_f H_0^\circ \text{ kJ}\cdot\text{mol}^{-1}$ |                | IUPAC lowest-locant abbreviation for dodeca(trifluoromethyl)( $C_{60}$ - $I_h$ )[5,6]fullerene |
|----------|-------------------------------------------------------------------------------------|-----------------------------------------------------------|----------------|------------------------------------------------------------------------------------------------|
|          |                                                                                     | DFT                                                       | AM1            |                                                                                                |
| 1        | 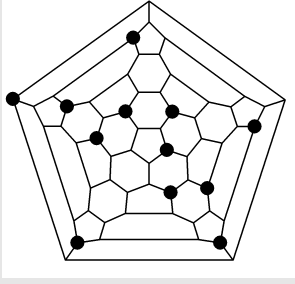   | 0.0<br>(0.0)                                              | 0.0<br>(0.0)   | 1, 6, 11, 16, 18, 26, 36, 44, 46, 49, 54, 60                                                   |
| 2        |   | 22.7<br>(21.1)                                            | 23.2<br>(22.8) | 1, 6, 8, 11, 16, 18, 23, 36, 46, 49, 54, 60                                                    |
| 3        |  | 25.7<br>(20.0)                                            | 23.7<br>(23.0) | 1, 6, 8, 11, 16, 18, 23, 28, 31, 36, 54, 60                                                    |
| 4        |  | 29.0<br>(18.8)                                            | 24.2<br>(22.5) | 1, 6, 8, 11, 16, 18, 23, 28, 31, 36, 41, 57                                                    |
| 5        |  | 31.4<br>(32.1)                                            | 42.9<br>(45.7) | 1, 3, 7, 10, 13, 17, 23, 28, 35, 40, 50, 60                                                    |

| $N_2.N_2$ | <i>Schlegel Diagrams of</i><br>$C_{60}(CF_3)_{12}$                                  | $\Delta \Delta_f H_0^\circ \text{ kJ}\cdot\text{mol}^{-1}$ |                | <i>IUPAC lowest-locant abbreviation for</i><br><i>dodeca(trifluoromethyl)(C<sub>60</sub>-I<sub>n</sub>)[5,6]fullerene</i> |
|-----------|-------------------------------------------------------------------------------------|------------------------------------------------------------|----------------|---------------------------------------------------------------------------------------------------------------------------|
|           |                                                                                     | <i>DFT</i>                                                 | <i>AMI</i>     |                                                                                                                           |
| 6         | 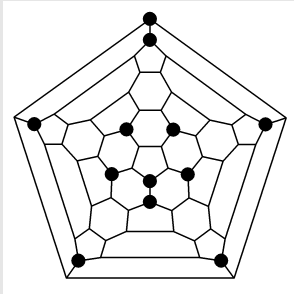   | 32.5<br>(32.6)                                             | 49.5<br>(43.8) | 1, 6, 9, 12, 15, 18, 43, 46, 49, 52, 55, 60                                                                               |
| 7         |    | 32.7                                                       | 49.9           | 1, 6, 9, 12, 15, 18, 43, 46, 49, 52, 55, 57                                                                               |
| 8         |   | 32.8                                                       | 45.8           | 1, 3, 7, 10, 13, 17, 23, 28, 35, 40, 48, 58                                                                               |
| 9         |  | 34.0                                                       | 46.9           | 1, 3, 7, 10, 13, 17, 28, 35, 43, 48, 55, 58                                                                               |
| 10        |  | 34.1                                                       | 50.9           | 1, 6, 9, 12, 15, 18, 43, 46, 49, 52, 55, 56                                                                               |

| $N_2.N_2$ | <i>Schlegel Diagrams of</i><br>$C_{60}(CF_3)_{12}$                                  | $\Delta \Delta_f H_0^\circ \text{ kJ}\cdot\text{mol}^{-1}$ |                | <i>IUPAC lowest-locant abbreviation for</i><br><i>dodeca(trifluoromethyl)(C<sub>60</sub>-I<sub>h</sub>)[5,6]fullerene</i> |
|-----------|-------------------------------------------------------------------------------------|------------------------------------------------------------|----------------|---------------------------------------------------------------------------------------------------------------------------|
|           |                                                                                     | <i>DFT</i>                                                 | <i>AMI</i>     |                                                                                                                           |
| 11        | 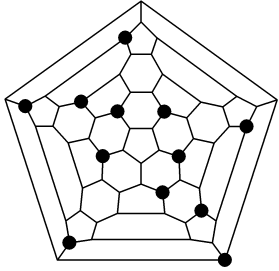   | 35.5<br>(35.5)                                             | 30.7<br>(33.2) | 1, 3, 7, 11, 17, 24, 34, 45, 50, 52, 55, 57                                                                               |
| 12        |    | 36.1                                                       | 44.3           | 1, 3, 7, 10, 13, 17, 28, 35, 43, 50, 55, 60                                                                               |
| 13        |   | 38.7                                                       | 44.6           | 1, 3, 7, 10, 14, 17, 28, 31, 43, 46, 52, 55                                                                               |
| 14        |  | 39.7<br>(39.8)                                             | 54.8<br>(53.3) | 1, 3, 6, 11, 13, 18, 24, 27, 33, 51, 54, 60                                                                               |
| 15        |  | 41.9<br>(42.0)                                             | 45.5<br>(39.8) | 1, 6, 12, 15, 18, 23, 25, 32, 35, 41, 45, 57                                                                              |

| $N_2, N_2$ | <i>Schlegel Diagrams of</i><br>$C_{60}(CF_3)_{12}$                                  | $\Delta \Delta_f H_0^\circ \text{ kJ}\cdot\text{mol}^{-1}$ |            | <i>IUPAC lowest-locant abbreviation for</i><br><i>dodeca(trifluoromethyl)(C<sub>60</sub>-I<sub>h</sub>)[5,6]fullerene</i> |
|------------|-------------------------------------------------------------------------------------|------------------------------------------------------------|------------|---------------------------------------------------------------------------------------------------------------------------|
|            |                                                                                     | <i>DFT</i>                                                 | <i>AMI</i> |                                                                                                                           |
| 16         | 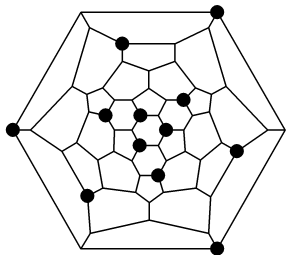   | 44.2                                                       | 45.5       | 1, 6, 8, 11, 18, 23, 33, 46, 49, 51, 54, 60                                                                               |
| 17         |    | 45.8                                                       | 50.0       | 1, 3, 7, 10, 14, 17, 21, 28, 31, 42, 52, 55                                                                               |
| 18         |   | 45.9                                                       | 46.2       | 1, 3, 7, 10, 14, 17, 21, 28, 31, 36, 39, 42                                                                               |
| 19         |  | 46.7                                                       | 49.8       | 1, 3, 7, 11, 13, 17, 23, 27, 35, 40, 50, 60                                                                               |

### References

[S1] Kareev, I. E., Shustova, N. B., Peryshkov, D. V., Lebedkin, S. F., Miller, S. M., Anderson, O. P., Popov, A. A., Boltalina, O. V., Strauss, S. H., *Chem. Commun.*, 2007, 1650.

**Table 2.** The Schlegel diagrams, relative energies (at the DFT and AM1 levels of theory), and IUPAC lowest-locant abbreviation for the most stable isomers of  $C_{60}(CF_3)_{14}$  within the gap of  $25 \text{ kJ}\cdot\text{mol}^{-1}$ . The fields with experimentally observed isomers are shadowed.

| $N_0N_0$ | Schlegel Diagrams of $C_{60}(CF_3)_{14}$                                            | $\Delta \Delta_f H_0^\circ \text{ kJ}\cdot\text{mol}^{-1}$ |      | IUPAC lowest-locant abbreviation for tetradeca(trifluoromethyl)( $C_{60}$ - $I_h$ )[5,6]fullerene |
|----------|-------------------------------------------------------------------------------------|------------------------------------------------------------|------|---------------------------------------------------------------------------------------------------|
|          |                                                                                     | DFT                                                        | AM1  |                                                                                                   |
| 1        | 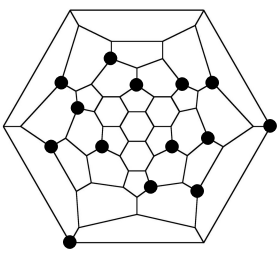   | 0.0                                                        | 0.5  | 1, 3, 6, 11, 13, 18, 26, 33, 41, 44, 46, 49, 51, 57                                               |
| 2        |    | 0.4                                                        | 16.6 | 1, 3, 7, 10, 11, 14, 17, 24, 27, 31, 36, 39, 47, 59                                               |
| 3        |  | 2.2                                                        | 0.0  | 1, 3, 6, 8, 11, 13, 18, 23, 33, 41, 46, 49, 51, 57                                                |
| 4        |  | 4.4                                                        | 3.0  | 1, 3, 8, 11, 13, 21, 23, 33, 38, 41, 46, 49, 51, 57                                               |
| 5        |  | 7.1                                                        | 19.0 | 1, 3, 7, 8, 11, 14, 17, 24, 27, 31, 36, 39, 47, 59                                                |

| $N_1, N_2$ | <i>Schlegel Diagrams of</i><br>$C_{60}(CF_3)_{14}$                                  | $\Delta \Delta_f H_0^\circ \text{ kJ}\cdot\text{mol}^{-1}$ |            | <i>IUPAC lowest-locant abbreviation for</i><br><i>tetradeca(trifluoromethyl)(C<sub>60</sub>-I<sub>b</sub>)[5,6]fullerene</i> |
|------------|-------------------------------------------------------------------------------------|------------------------------------------------------------|------------|------------------------------------------------------------------------------------------------------------------------------|
|            |                                                                                     | <i>DFT</i>                                                 | <i>AMI</i> |                                                                                                                              |
| 6          | 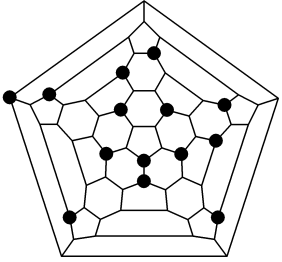   | 8.3                                                        | 18.7       | 1, 3, 7, 8, 11, 14, 17, 24, 27, 31, 47, 52, 55, 59                                                                           |
| 7          |    | 9.0                                                        | 3.9        | 1, 3, 8, 11, 13, 16, 21, 23, 36, 38, 41, 46, 49, 57                                                                          |
| 8          |   | 9.4                                                        | 18.0       | 1, 3, 7, 10, 13, 28, 33, 38, 43, 48, 51, 53, 55, 58                                                                          |
| 9          |  | 10.4                                                       | 18.7       | 1, 3, 6, 11, 13, 18, 22, 25, 33, 41, 46, 49, 51, 57                                                                          |
| 10         |  | 12.2                                                       | 19.6       | 1, 3, 6, 11, 13, 18, 24, 27, 33, 41, 46, 49, 51, 57                                                                          |



| $N_1, N_2$ | <i>Schlegel Diagrams of</i><br>$C_{60}(CF_3)_{14}$                                  | $\Delta \Delta_f H_0^\circ \text{ kJ}\cdot\text{mol}^{-1}$ |            | <i>IUPAC lowest-locant abbreviation for</i><br><i>tetradeca(trifluoromethyl)(C<sub>60</sub>-I<sub>n</sub>)[5,6]fullerene</i> |
|------------|-------------------------------------------------------------------------------------|------------------------------------------------------------|------------|------------------------------------------------------------------------------------------------------------------------------|
|            |                                                                                     | <i>DFT</i>                                                 | <i>AMI</i> |                                                                                                                              |
| 11         | 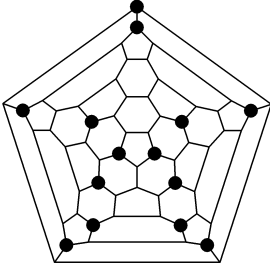   | 13.0                                                       | 23.0       | 1, 3, 7, 10, 14, 17, 28, 31, 43, 46, 49, 52, 55, 56                                                                          |
| 12         |    | 13.7                                                       | 17.8       | 1, 3, 7, 10, 13, 28, 33, 38, 43, 46, 49, 51, 53, 55                                                                          |
| 13         |   | 14.0                                                       | 9.1        | 1, 3, 7, 10, 17, 23, 28, 30, 33, 38, 40, 50, 53, 60                                                                          |
| 14         |  | 16.0                                                       | 22.9       | 1, 3, 7, 10, 13, 17, 23, 28, 35, 40, 43, 50, 55, 60                                                                          |
| 15         |  | 16.0                                                       | 22.6       | 1, 2, 7, 10, 20, 24, 27, 29, 34, 37, 39, 48, 51, 59                                                                          |

| $N_1, N_2$ | <i>Schlegel Diagrams of</i><br>$C_{60}(CF_3)_{14}$                                  | $\Delta \Delta_f H_0^\circ \text{ kJ}\cdot\text{mol}^{-1}$ |            | <i>IUPAC lowest-locant abbreviation for</i><br><i>tetradeca(trifluoromethyl)(C<sub>60</sub>-I<sub>b</sub>)[5,6]fullerene</i> |
|------------|-------------------------------------------------------------------------------------|------------------------------------------------------------|------------|------------------------------------------------------------------------------------------------------------------------------|
|            |                                                                                     | <i>DFT</i>                                                 | <i>AMI</i> |                                                                                                                              |
| 16         | 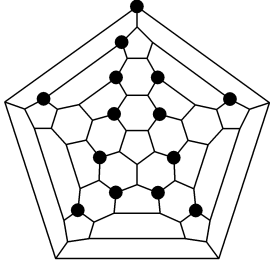   | 16.1                                                       | 20.4       | 1, 3, 7, 8, 11, 13, 17, 24, 27, 32, 36, 39, 51, 59                                                                           |
| 17         |    | 16.4                                                       | 18.7       | 1, 3, 7, 10, 13, 17, 28, 32, 36, 39, 43, 46, 51, 59                                                                          |
| 18         |   | 16.5                                                       | 18.9       | 1, 3, 7, 10, 13, 23, 28, 33, 38, 40, 48, 51, 53, 58                                                                          |
| 19         |  | 16.6                                                       | 18.6       | 1, 3, 7, 10, 13, 17, 28, 32, 34, 43, 46, 52, 55, 59                                                                          |
| 20         |  | 19.5                                                       | 20.2       | 1, 3, 7, 10, 13, 17, 28, 33, 35, 43, 46, 49, 55, 60                                                                          |

| $N_u.N_b$ | Schlegel Diagrams of<br>$C_{60}(CF_3)_{14}$                                         | $\Delta \Delta_f H_o^\circ \text{ kJ}\cdot\text{mol}^{-1}$ |      | IUPAC lowest-locant abbreviation for<br>tetradeca(trifluoromethyl)( $C_{60}$ - $I_b$ )[5,6]fullerene |
|-----------|-------------------------------------------------------------------------------------|------------------------------------------------------------|------|------------------------------------------------------------------------------------------------------|
|           |                                                                                     | DFT                                                        | AMI  |                                                                                                      |
| 21        | 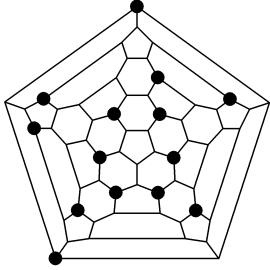   | 19.9                                                       | 24.4 | 1, 3, 7, 10, 14, 17, 23, 28, 31, 40, 43, 49, 52, 55                                                  |
| 22        |    | 22.0                                                       | 23.5 | 1, 3, 6, 8, 11, 13, 18, 23, 33, 46, 49, 51, 54, 60                                                   |
| 23        |   | 22.8                                                       | 14.0 | 1, 3, 7, 10, 14, 17, 21, 28, 31, 36, 39, 42, 45, 57                                                  |
| 24        |  | 23.4                                                       | 23.4 | 1, 3, 7, 10, 13, 17, 28, 32, 36, 39, 43, 48, 55, 58                                                  |
| 25        |  | 24.0                                                       | 24.5 | 1, 3, 7, 10, 13, 17, 28, 32, 38, 43, 48, 53, 55, 58                                                  |
